# Supplementary material for: Poly(ionic liquid)s having coumarate counter-anions as corrosion inhibitors in acrylic UV coatings
Source: Royal Society of Chemistry journal article supplement (doi:10.1039/d3lp00017f), 2023-01-01
Supplement: d3lp00017f1.pdf [file d3lp00017f1.pdf]

## Supporting information

### Poly(ionic liquid)s having coumarate counter-anions as corrosion inhibitors in acrylic UV coatings

Daniela Minudri<sup>a</sup>, Anthony Somers<sup>b</sup>, Nerea Casado<sup>ac</sup>, Maria Forsyth<sup>abc</sup>, David Mecerreyes<sup>ac</sup>

<sup>a</sup> POLYMAT<sup>†</sup> University of the Basque Country UPV/EHU, Joxe Mari Korta Center, Donostia-San Sebastian 20018, Spain

<sup>b</sup> Institute for Frontier Materials, Deakin University, Geelong, Victoria, 3220, Australia

<sup>c</sup> IKERBASQUE Basque Foundation for Science, Bilbao, Spain

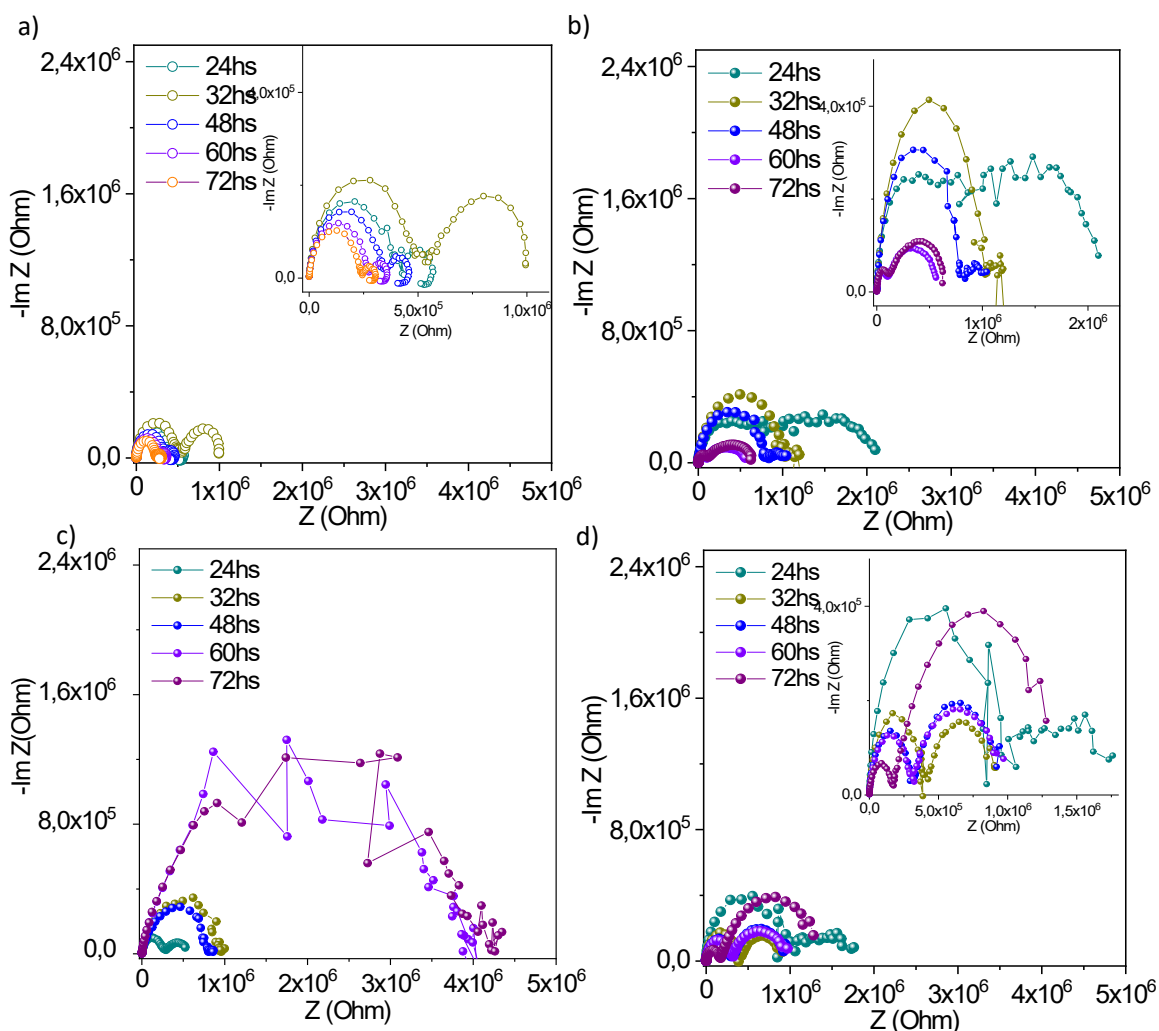

Figure S1: Nyquist plot of electrochemical impedance spectra for different polymer coatings on AS1020 mild steel immersed in 0.01 M NaCl a) coating without inhibitor (control), b) PolyDADMA-COU 5 wt %, c) PolyDADMA-COU 10 wt %, d) PolyDADMA-COU 20 wt %

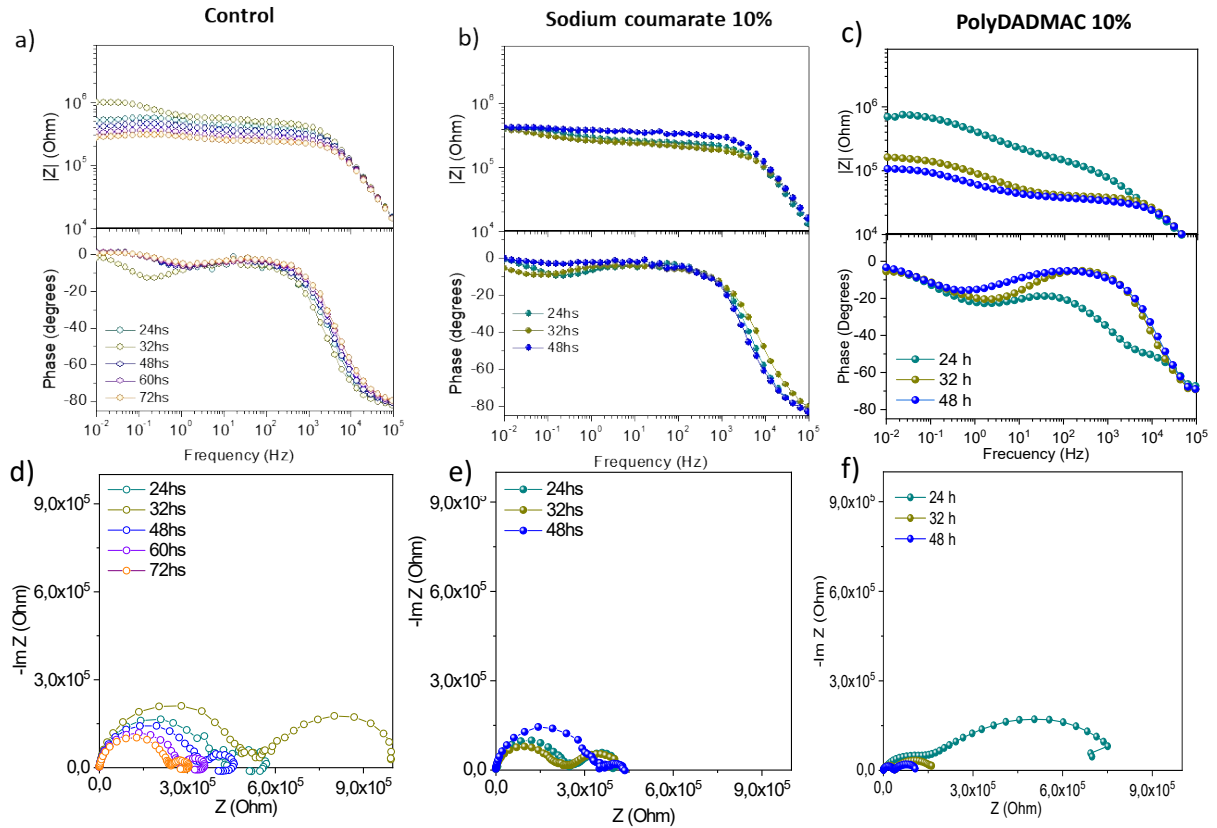

Figure S2: a), b) and c) Bode plots of the electrochemical impedance of control coating, coating containing 10 wt% of sodium coumarate and coating containing 10 wt% of PolyDADMAC respectively. C), d) and e) Nyquist plot of control coating, coating containing

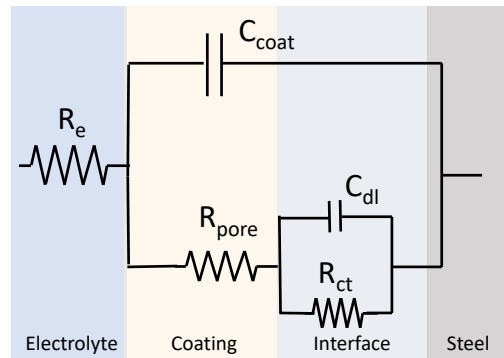

10 wt% of sodium coumarate and coating containing 10 wt% of PolyDADMAC respectively

Figure S3: Equivalent circuits used for numerical fitting of the EIS data

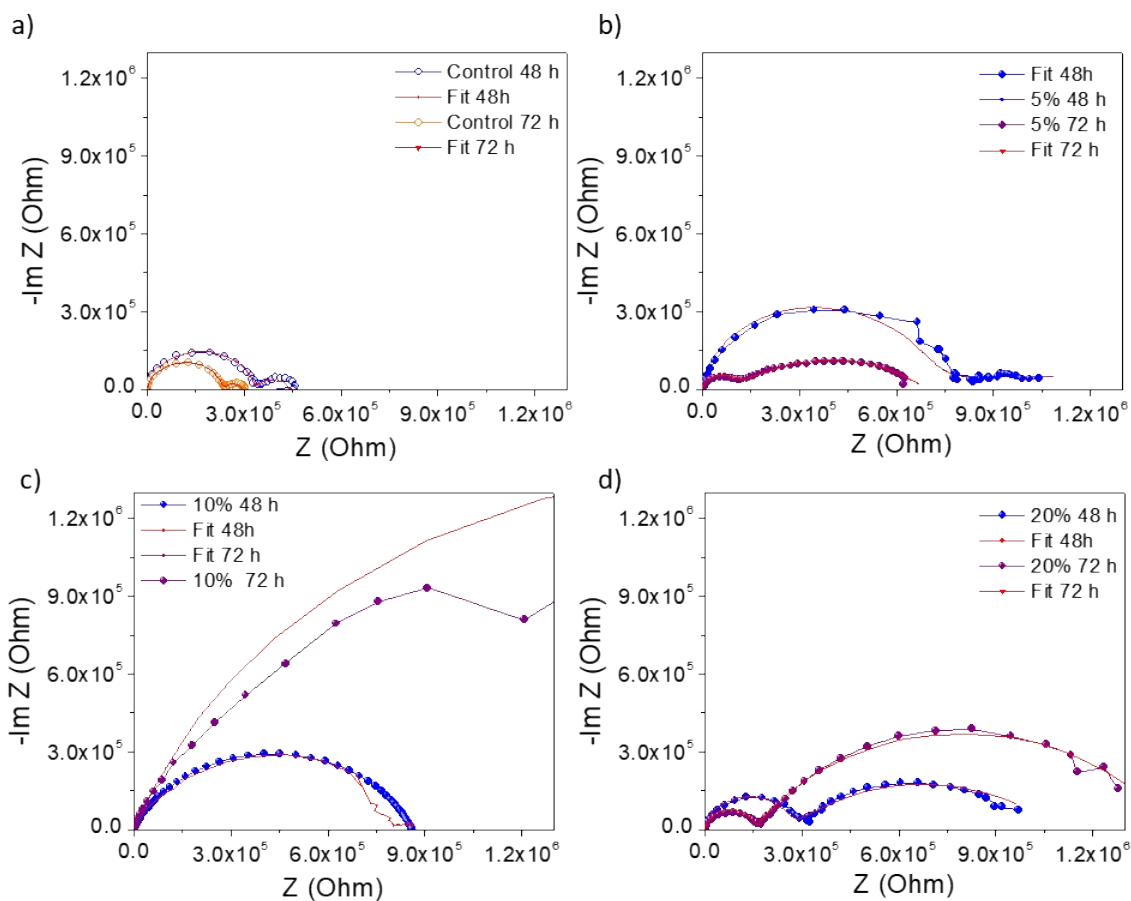

Figure S4: Nyquist plots for 48 h and 72 h from EIS experiment and mathematically fitted Nyquist plots (red line) of a) control coating b), c), and d) coating containing 5%, 10% and 20% of polyDADMA-COU.

| Sample  | Time (h) | $C_{\text{coat}}$ ( $\text{nF} \cdot \text{s}^{\text{ncoat}-1}$ ) | $n_{\text{coat}}$ | $R_{\text{pore}}$ ( $\Omega$ ) | $C_{\text{dl}}$ ( $\mu\text{F} \cdot \text{s}^{\text{ndl}-1}$ ) | $n_{\text{dl}}$ | $R_{\text{ct}}$ ( $\Omega$ ) | $\chi^2/ Z $ |
|---------|----------|-------------------------------------------------------------------|-------------------|--------------------------------|-----------------------------------------------------------------|-----------------|------------------------------|--------------|
| Control | 48       | 0.25                                                              | 0.94              | 330232                         | 1.45                                                            | 0.60            | 134274                       | 0.44         |
|         | 72       | 0.30                                                              | 0.93              | 232933                         | 3,12                                                            | 0.56            | 90326                        | 0.62         |
| 5%      | 48       | 0.30                                                              | 1                 | 606384                         | 1.17                                                            | 0.26            | 516530                       | 4,87         |
|         | 72       | 0.92                                                              | 0,93              | 89648                          | 0.77                                                            | 0.44            | 612585                       | 0.40         |
| 10%     | 48       | 1.05                                                              | 0,98              | 775666                         | 0,01                                                            | 0.59            | 812840                       | 4,64         |
|         | 72       | 0.69                                                              | 1                 | 773178                         | 0.01                                                            | 0.69            | 3342000                      | 10.07        |
| 20%     | 48       | 0.50                                                              | 0.97              | 258736                         | 1.14                                                            | 0.50            | 837389                       | 3.76         |
|         | 72       | 0.63                                                              | 1                 | 153880                         | 0.98                                                            | 0.66            | 1289000                      | 9.20         |

Table S1: Fitting results for coatings after 48 h and 72 h of experiment

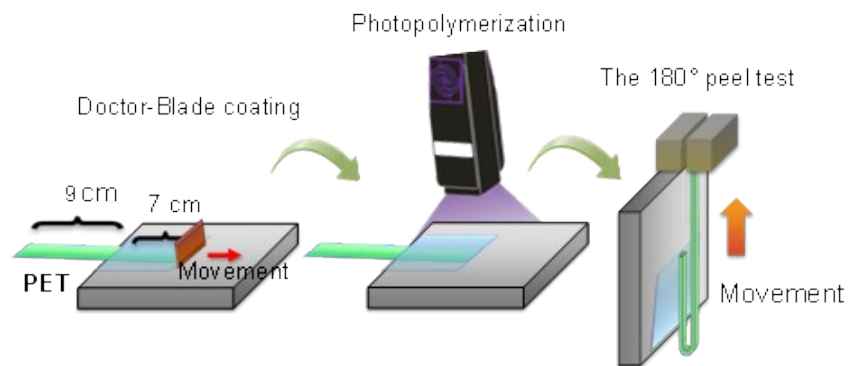

Figure S5: Adhesion test setup
